# Supplementary material for: Metal oxide QD based ultrasensitive microsphere fluorescent sensor for copper, chromium and iron ions in water
Source: Royal Society of Chemistry journal article supplement (doi:10.1039/c9ra09985a), 2020-01-01
Supplement: c9ra09985a1.pdf [file c9ra09985a1.pdf]

# Metal oxide QDs based ultrasensitive microsphere fluorescent sensor for copper, chromium and iron ions in water

Md. Motiar Rahaman Khan<sup>a†</sup>, Tapas Mitra<sup>a†</sup>, Dibakar Sahoo<sup>b\*</sup>

<sup>a</sup>Department of Biochemistry, University of Calcutta, Kolkata-700019, India

<sup>b</sup>School of Physics, Sambalpur University, Jyoti Vihar, Burla, Odisha 768019, India

†Both authors have equal contribution

\*Email Address: [iamdibakar@suniv.ac.in](mailto:iamdibakar@suniv.ac.in)

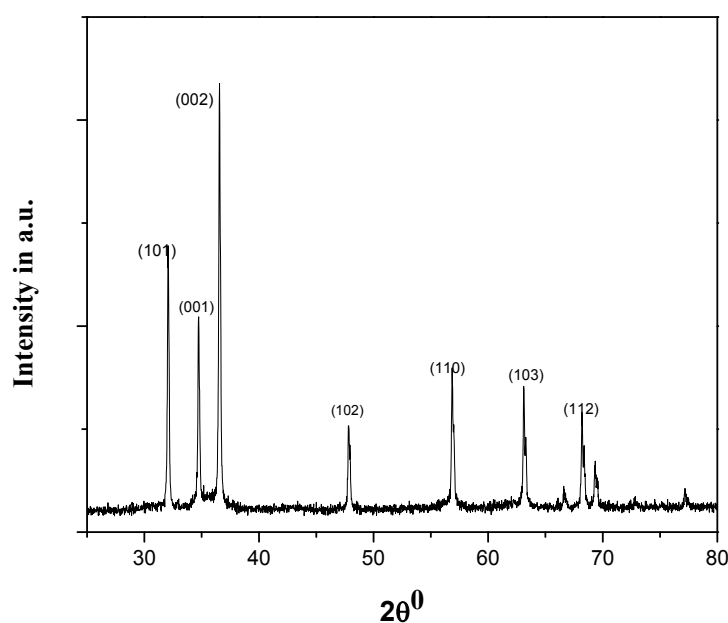

Figure S1a: XRD spectrum of synthesized ZCM microsphere

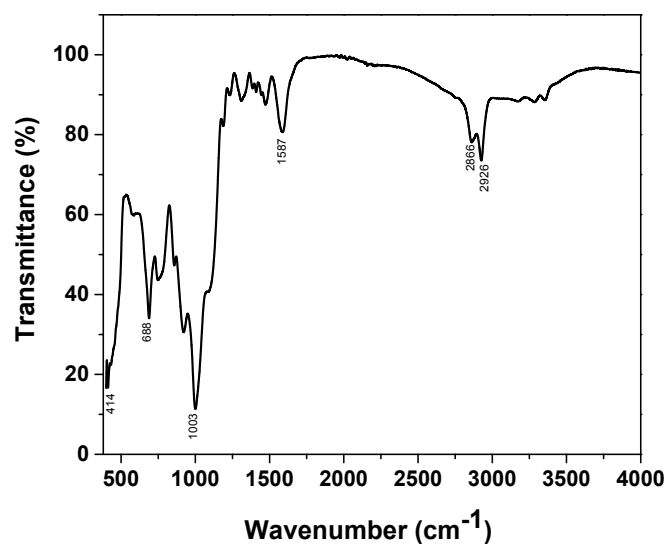

**Figure S1b: FTIR spectrum of synthesized ZCM microsphere**

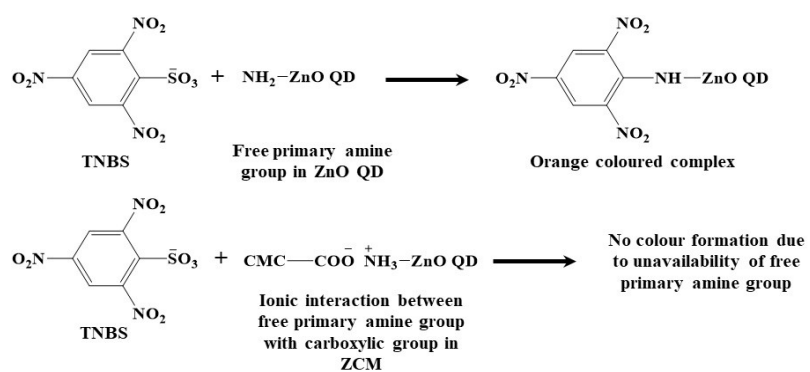

**Scheme S1: TNBS assay chemistry for ZnO QDs and ZCM**

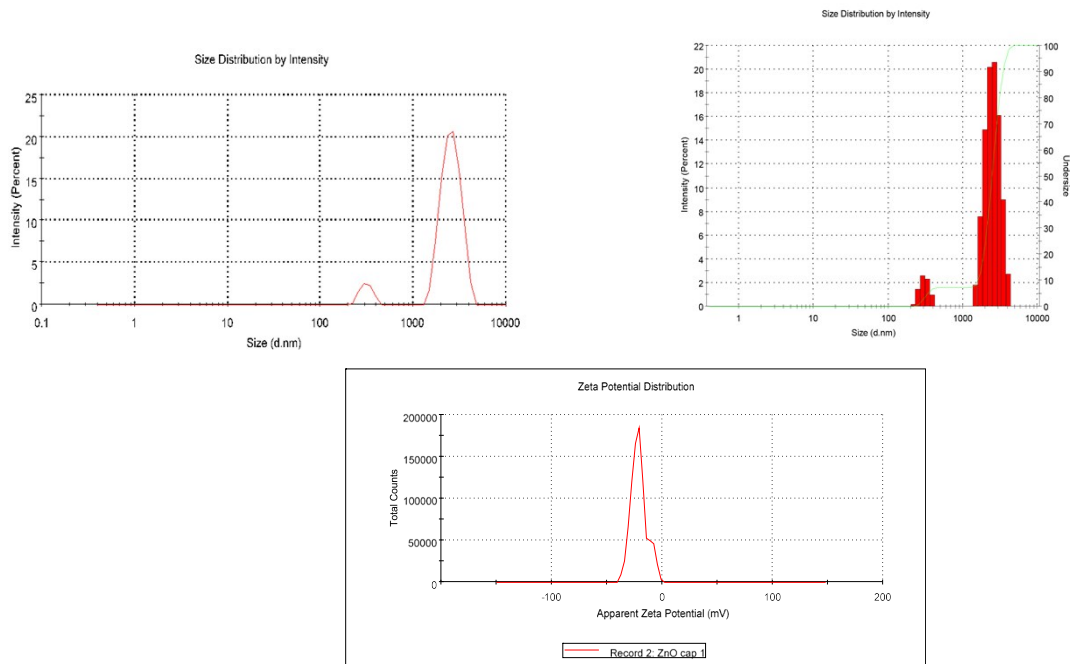

**Figure S2. (a) DLS (b) Histogram of size distribution (c) Zeta potential of ZCM microsphere**

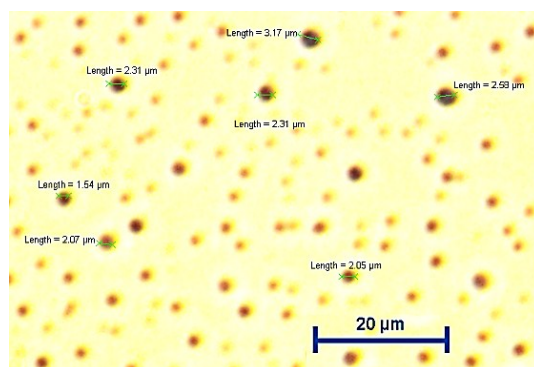

**Figure S3: Fluorescence Microscopic image of ZCM microsphere**

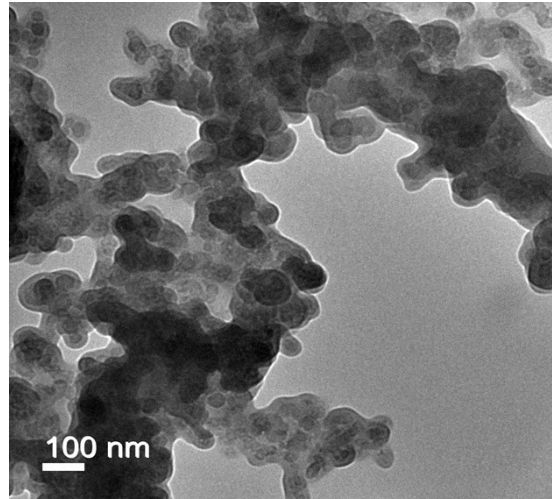

Figure S4: TEM image of ZCM microsphere (Only QDs inside microsphere are detected)

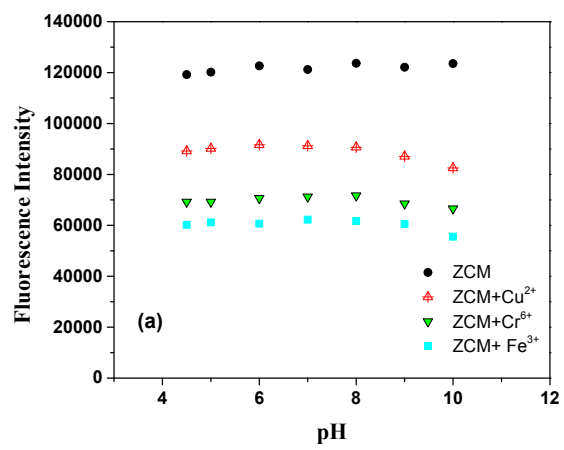

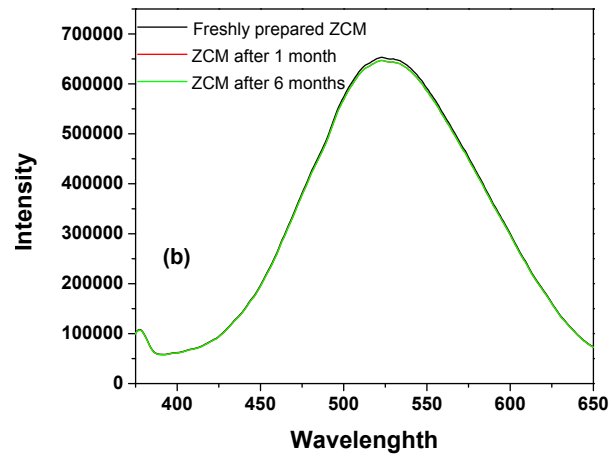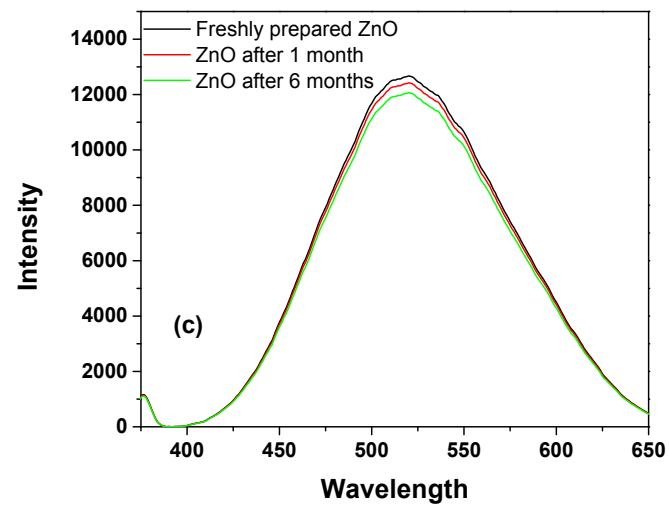

**Figure S5.** Fluorescence stability of as-prepared ZCM (a) in different pH solutions, (b) time scan for 6 months at 340 nm excitation. (c) time scan for ZnO QDs

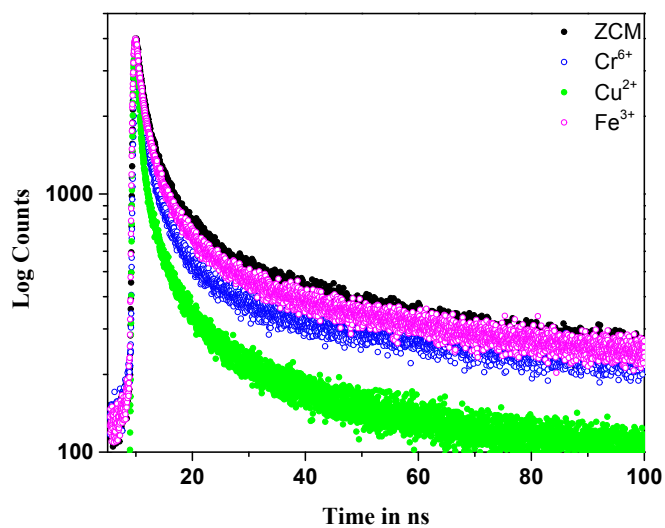

**Figure S6:** Time-resolved fluorescence decays of ZCM in aqueous solution and in presence of different metal ions.

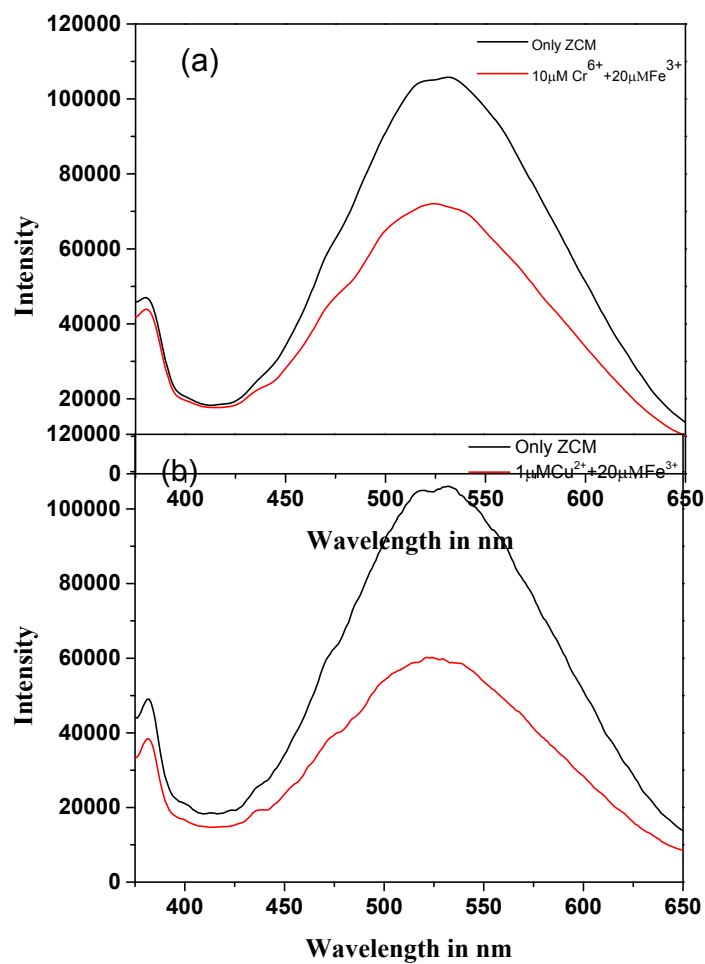

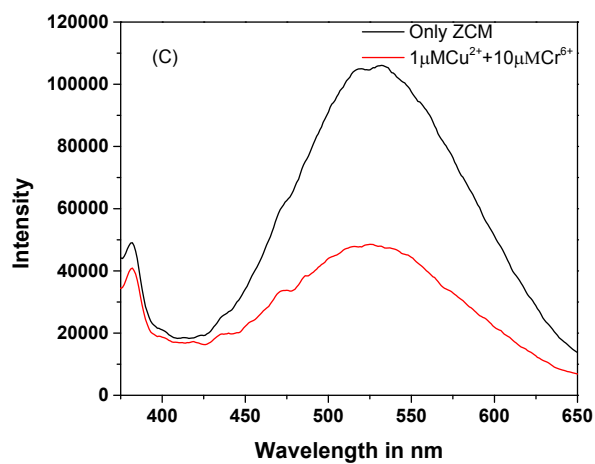

**Figure S7 :** Fluorescence intensity of ZCM in presence of two metal ions (a)  $\text{Cr}^{6+}$  and  $\text{Fe}^{3+}$  (b)  $\text{Cu}^{2+}$  and  $\text{Fe}^{3+}$  (c)  $\text{Cu}^{2+}$  and  $\text{Cr}^{6+}$

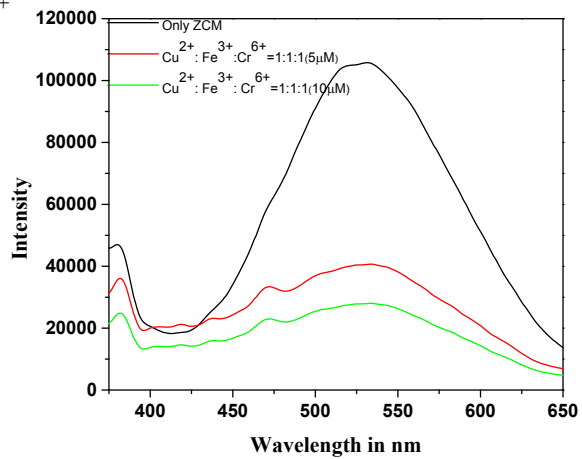

**Figure S8:** Fluorescence Intensity of ZCM in presence of three metal ions ( $\text{Cu}^{2+}$ ,  $\text{Fe}^{3+}$ ,  $\text{Cr}^{6+}$ ) of different concentration.

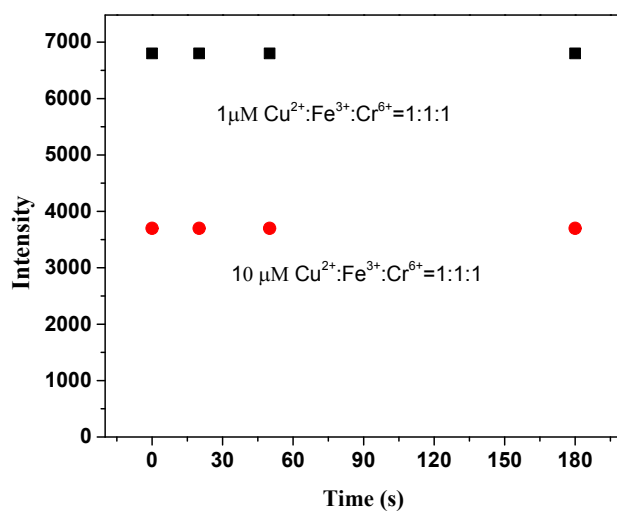

**Figure S9:** Fluorescence Intensity of ZCM in presence of different concentration of mixed metal ions at different time
